# Supplementary material for: Stakeholders’ Requirements for Artificial Intelligence for Healthcare in Korea
Source: PubMed Central journal article supplement — Healthc Inform Res. 2022 Apr 30;28(2):143–51. doi: 10.4258/hir.2022.28.2.143 (PMC9117806; doi:10.4258/hir.2022.28.2.143), 2022-04-30
Supplement: hir-2022-28-2-143-suppl.pdf [file hir-2022-28-2-143-suppl.pdf]

## Semi-Structured Interview Format

### 1. Introduction (5–10 mins)

- 1) Greeting / Interview background and rationale
- 2) Agreement and Confirmation(Recording and participation in research)

### 2. Initiation (3–5 min): Small talk (optional)

- 1) Sex/ Age
- 2) Major and Specialty

### 3. Trends (10 mins)

- 1) What do you do and how the AI tech is applied over your field? Which field or aspect require AI tech the most?
  - How do you think about level of current health care AI tech? if you are not in the health-care please describe based on your field.
    - Please describe difference between ROK and advanced countries
- 2) What are the limits of current healthcare AI solutions and technologies?
  - In regards of health care AI, commercialization is very limited under very strict regulations (PIPA , GDPR like privacy issue). What are the alternatives to the Korean Market?

### 4. Essential Questions (20 mins)

- 1) What should be the direction of health-care AI?
  - In order to have right direction, what kind of R&D Project shell be needed? If there is idea how do you name your project?
  - Can you presume the kind and needed scale of man-power and resources?
  - What's the role of government and hospitals?
  - Please, draw a brief blue print(action-plan) of your project in a year.
- 2) What are the component of establishment of health-care AI governance?
- 3) What if health-care AI spread out enough, what challenges do we need to address?
- 4) What if Data AI department is established, what are the things government should prepare?

### 5. Closing (5 mins)

- 1) Additional Comments related to the topic?

Thank you for your participation!

Figure S1. Semi-structured format of the expert interviews.

## Survey on Artificial Intelligence for Healthcare

This survey would like to collect data which requirements from stakeholders about artificial intelligence for healthcare. Please respond to the following short survey.

### Q1. Affiliation \*

- Academia
- Industry
- Hospital

### Q1-1. Department (If you chose 'Hospital')

Long answer text

### Q2. Target disease desired to be developed or applied \*

Long answer text

### Q3. Data (Multiple choice) \*

- Laboratory test result
- Image (CT, MRI, etc.)
- Genome
- Vital Sign
- Radiology or Pathology reports
- Medical notes in free-text format including progress reports
- Other...

### Q4. Solution \*

- Diagnostic prediction
- Prognostic prediction
- Treatment
- Monitoring
- Other...

Figure S2. Survey format for the members of the Korean Society of Artificial Intelligence in Medicine (KOSAIM).
